# Supplementary material for: Treatment of De Novo Renal Transplant Recipients With Calcineurin Inhibitor–free, Belatacept Plus Everolimus–based Immunosuppression
Source: PubMed Central journal article supplement — Transplant Direct. 2023 Jan 6;9(2):e1419. doi: 10.1097/TXD.0000000000001419 (PMC9820789; doi:10.1097/txd.0000000000001419), 2023-01-06

## **Treatment of De Novo Renal Transplant Recipients With Calcineurin Inhibitor-free, Belatacept Plus Everolimus–based Immunosuppression**

V. Ram Peddi, MD,<sup>1</sup> Bradley Marder, MD,<sup>2</sup> Luis Gaité, MD,<sup>3</sup> Jose Oberholzer, MD,<sup>4</sup> Ryan Goldberg, MD,<sup>5</sup> Thomas Pearson, MD,<sup>6</sup> Harold Yang, MD, PhD,<sup>7</sup> Lisa Allamassey, MSc,<sup>8</sup> Martin Polinsky, MD,<sup>9</sup> and Richard N. Formica, MD<sup>10</sup>

***Supplemental material***

**Table S1. List of Independent Ethics Committees (IEC) and/or Institutional Review Boards (IRB)**

| <b>Study Site</b>                                            | <b>IEC/IRB Name</b>                                                                                                          | <b>IEC/IRB Protocol No.</b> | <b>IEC/IRB Approval No.</b> |
|--------------------------------------------------------------|------------------------------------------------------------------------------------------------------------------------------|-----------------------------|-----------------------------|
| University of Virginia                                       | University of Virginia Institutional Review Board for Health Sciences Research                                               | IM10177                     | 17482                       |
| California Institute of Renal Research                       | Sharp Healthcare Institutional Review Board                                                                                  | 140598                      |                             |
| Emory University                                             | Emory University IRB                                                                                                         | IRB00072295                 | CR5_IRB0072295              |
| California Pacific Medical Center                            | Western Institutional Review Board                                                                                           | 1156605                     | 20132295                    |
| Central PA Transplant Foundation                             | Pinnacle Health Institutional Review Board                                                                                   | PHH# 14-016                 |                             |
| University of Colorado Hospital Anschutz Medical Campus      | Western Institutional Review Board                                                                                           | 1146595                     | 20132295                    |
| University of Colorado Hospital Anschutz Outpatient Pavilion | Western Institutional Review Board                                                                                           | 1142089                     | 20130763                    |
| Clinica Privada Velez Sarsfield                              | Clinica Chutro CIEIS                                                                                                         | IM 103177                   |                             |
| Sanatorio Parque S.A.                                        | Comite de Docencia E Investigacion Sanatorio Parque S.A.                                                                     | IM103177                    |                             |
| University of Illinois at Chicago                            | University Of Illinois At Chicago, Office for Protection of Research Subjects (OPRS), Office of Vice Chancellor for Research | 2014-0405                   | 00006437                    |
| Clinica de Nefrologia, Urologia y Enf. Cardiovasculares      | Comité de Etica en Investigacion Clinica                                                                                     | IM103177                    | 1105/23/2014                |
| Vanderbilt University Medical Center                         | Vanderbilt University Medical Center, Human Research Protection Program                                                      | 140714                      |                             |
| Yale University                                              | Yale University, Human Investigation Committee                                                                               | 1406014090                  | RNI00000856                 |
| Georgetown University Hospital                               | Georgetown University IRB                                                                                                    | 2014-0244                   |                             |

|                                                                   |                                                                               |             |               |
|-------------------------------------------------------------------|-------------------------------------------------------------------------------|-------------|---------------|
| Wake Forest University School of Medicine                         | Human Research Protection Program IRB, Wake Forest University Health Sciences | IRB00027206 |               |
| Inova Fairfax Hospital                                            | Western Institutional Review Board                                            | 1159767     | 20132295      |
| Erie County Medical Center                                        | SUNY Buffalo Health Sciences, Health Sciences IRB                             |             | MODCR00001527 |
| Tulane Medical Center                                             | Tulane Human Research Protection Office, Tulane University Biomedical IRB     | IM103177    | 572705        |
| Saint Barnabas Medical Center                                     | Saint Barnabas Medical Center IRB                                             | 15-28       | 7605          |
| Swedish Medical Center, Swedish Organ Transplant and Liver Center | Western Institutional Review Board                                            | 1157400     | 20132295      |
| Presbyterian St. Lukes Medical Center, Colorado Kidney Care       | Western Institutional Review Board                                            | 1163408     | 20132295      |

**Table S2. Treatment exposure (mITT analysis)**

|                                      | <b>BELA+EVL (n = 25)</b> |                      | <b>TAC+MMF (n = 33)</b> |                      |
|--------------------------------------|--------------------------|----------------------|-------------------------|----------------------|
| <b>Treatment duration, days</b>      |                          |                      |                         |                      |
| Mean (SD)                            | 691.2 (193.8)            |                      | 652.9 (226.3)           |                      |
| Median (range)                       | 757.0 (56–765)           |                      | 737.0 (11–783)          |                      |
| <b>BELA infusions, n</b>             |                          |                      |                         |                      |
| Median (range)                       | 29.0 (4–29)              |                      | NA                      |                      |
| <b>Daily dose of corticosteroids</b> | <b>n</b>                 | <b>mean (SD), mg</b> | <b>n</b>                | <b>mean (SD), mg</b> |
| Day 1                                | 25                       | 664.0 (137.1)        | 32                      | 664.5 (153.6)        |
| Day 2                                | 24                       | 340.1 (154.6)        | 33                      | 313.5 (3.7)          |
| Day 3                                | 25                       | 166.2 (70.4)         | 30                      | 173.3 (64.4)         |
| Day 4                                | 25                       | 76.7 (50.3)          | 27                      | 74.9 (30.2)          |
| Day 5                                | 22                       | 39.0 (27.7)          | 24                      | 33.4 (9.4)           |
| Day 6                                | 19                       | 38.4 (36.3)          | 22                      | 32.7 (8.2)           |
| Day 7                                | 17                       | 30.2 (6.0)           | 16                      | 30.5 (1.9)           |
| <b>Daily dose of EVL or MMF</b>      | <b>n</b>                 | <b>mean (SD), mg</b> | <b>n</b>                | <b>mean (SD), mg</b> |
| ≤1 month                             | 25                       | 3.2 (1.0)            | 33                      | 1802.0 (398.0)       |
| 2–3 months                           | 24                       | 3.4 (1.6)            | 31                      | 1735.3 (445.3)       |
| 4–6 months                           | 23                       | 3.2 (1.7)            | 30                      | 1647.9 (594.7)       |
| 7–9 months                           | 22                       | 3.0 (1.6)            | 29                      | 1529.9 (632.6)       |
| 10–12 months                         | 22                       | 2.8 (1.5)            | 29                      | 1523.5 (630.1)       |
| 13–15 months                         | 22                       | 2.7 (1.5)            | 28                      | 1536.7 (529.3)       |
| 16–18 months                         | 21                       | 2.7 (1.6)            | 28                      | 1401.4 (565.2)       |
| 19–21 months                         | 21                       | 2.7 (1.5)            | 28                      | 1343.2 (604.9)       |
| 22–24 months                         | 21                       | 2.5 (1.4)            | 27                      | 1342.3 (606.7)       |

| rATG induction dose | BELA+EVL (n = 25) |                     | TAC+MMF (n = 33) |                     |
|---------------------|-------------------|---------------------|------------------|---------------------|
|                     | n                 | mean (SD),<br>mg/kg | n                | mean (SD),<br>mg/kg |
| Dose 1 <sup>a</sup> | 25                | 1.4 (0.3)           | 33               | 1.4 (0.2)           |
| Dose 2              | 25                | 1.3 (0.3)           | 32               | 1.3 (0.2)           |
| Dose 3              | 25                | 1.3 (0.3)           | 31               | 1.4 (0.5)           |
| Dose 4              | 11                | 1.0 (0.1)           | 11               | 1.0 (0.2)           |
| Dose 5              | 5                 | 1.1 (0.2)           | 2                | 1.0 (0.0)           |

<sup>a</sup>Dose1 (baseline/day of transplantation). BELA, belatacept; EVL, everolimus; mITT, modified intent-to-treat; MMF, mycophenolate mofetil; NA, not applicable; rATG, rabbit antithymocyte globulin; TAC, tacrolimus.

**Table S3. Serum trough concentrations of BELA, EVL, and TAC**

|          | BELA |                  | EVL |                  | TAC |                  |
|----------|------|------------------|-----|------------------|-----|------------------|
|          | n    | mean (SD), µg/mL | n   | mean (SD), ng/mL | n   | mean (SD), ng/mL |
| Week 4   | 22   | 32.26 (9.25)     | 23  | 7.06 (3.46)      | 32  | 8.32 (2.47)      |
| Week 12  | --   | --               | 19  | 7.38 (3.04)      | 30  | 9.00 (3.19)      |
| Week 20  | 21   | 7.72 (3.93)      | 20  | 5.58 (2.21)      | 28  | 9.72 (4.30)      |
| Week 24  | 21   | 5.75 (2.93)      | 22  | 6.83 (2.46)      | 26  | 8.36 (2.48)      |
| Week 48  | --   | --               | 20  | 5.85 (2.47)      | --  | --               |
| Week 52  | 19   | 5.78 (2.93)      | 20  | 4.95 (1.88)      | 26  | 7.95 (3.07)      |
| Week 76  | --   | --               | 17  | 4.47 (1.85)      | 20  | 7.28 (2.50)      |
| Week 104 | --   | --               | 18  | 5.65 (2.28)      | 15  | 7.20 (1.72)      |

BELA, belatacept; EVL, everolimus; TAC, tacrolimus.

**Table S4. Antihypertensive medications and lipid-lowering therapy (ITT analysis)**

|                                      | <b>BELA+EVL<br/>(n = 26)</b> | <b>TAC+MMF<br/>(n = 32)</b> |
|--------------------------------------|------------------------------|-----------------------------|
| <b>Antihypertensive drug therapy</b> |                              |                             |
| <b>Baseline</b>                      |                              |                             |
| Patients who received medications, n | 18                           | 21                          |
| Number of medications, mean (SD)     | 2.1 (0.8)                    | 2.3 (1.9)                   |
| <b>Month 24</b>                      |                              |                             |
| Patients who received medications, n | 18                           | 20                          |
| Number of medications, mean (SD)     | 1.7 (1.0)                    | 1.9 (0.9)                   |
| <b>Lipid-lowering drug therapy</b>   |                              |                             |
| <b>Baseline</b>                      |                              |                             |
| Patients who received medications, n | 9                            | 8                           |
| Number of medications, mean (SD)     | 1.2 (0.4)                    | 1.0 (0)                     |
| <b>Month 24</b>                      |                              |                             |
| Patients who received medications, n | 13                           | 15                          |
| Number of medications, mean (SD)     | 1.5 (0.7)                    | 1.2 (0.4)                   |

BELA, belatacept; EVL, everolimus; ITT, intent-to-treat; MMF, mycophenolate mofetil; TAC, tacrolimus.

**Figure S1.** Trial design. <sup>a</sup>All doses of rATG were preceded by intravenous methylprednisolone premedication. The first dose of rATG induction was administered intraoperatively prior to vascular reperfusion of the allograft. <sup>b</sup>It was a requirement to test for the presence of anti-BELA antibodies; this was applied only to patients randomized to BELA+EVL who either prematurely discontinued or did not continue to receive BELA following the final week 104 study visit. BELA, belatacept; BPAR, biopsy-proven acute rejection; DSA, donor-specific antibody; eGFR, estimated glomerular filtration rate; EVL, everolimus; MMF, mycophenolate mofetil; rATG, rabbit antithymocyte globulin; TAC, tacrolimus.

**Endpoints**

Primary: Incidence of BPAR at month 6

Secondary: Frequency and severity of BPAR, eGFR, death, graft loss, DSAs, and safety/tolerability

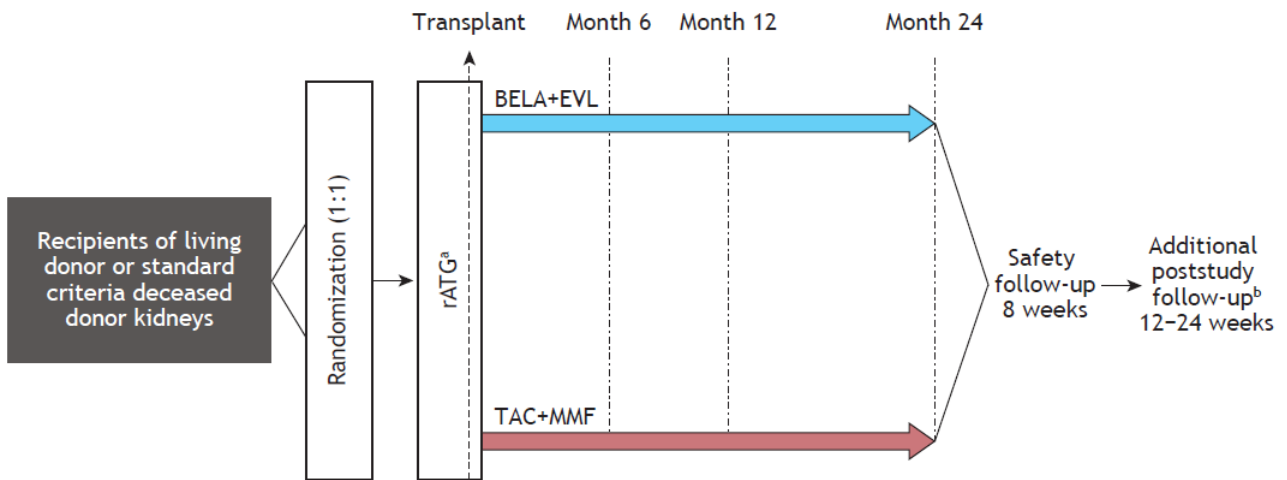

Supplement: txd-9-e1419-s001.pdf [file txd-9-e1419-s001.pdf]
